# Supplementary material for: Decades of Urban Water Quality Data: A Multivariate Exploration Using Indianapolis as a Case Study
Source: Research Square preprint supplement (doi:10.21203/rs.3.rs-8348281/v1), 2026-02-13
Supplement: Supplementary file 1 [file 272b2959684e01b8e6148b27.docx]

**Supplementary Materials A. Detailed Results**

**Article Title:** Decades of Urban Water Quality Data: A Multivariate Exploration Using Indianapolis as a Case Study

**Journal:** Environmental Monitoring and Assessment

**Authors:** Raenah Bailey, Gabriel Filippelli, Jeffery Wilson

**Corresponding Author:**

Raenah Bailey
Department of Earth Sciences, Indiana University Indianapolis
Indianapolis, Indiana 46202, USA
Email: raeabail@iu.edu

**A1. Overview**

This Supplementary Materials document provides the full technical results supporting the analyses presented in the manuscript. It includes full descriptive statistics, principal component analysis (PCA) loading matrices, clustering, and spatial figures that were condensed in the main Results section for clarity and readability. These materials ensure transparency and reproducibility of the multivariate analyses. Additional site-level visualizations and interactive summaries are also available in the accompanying web application (<https://raeabail.github.io/indy-urban-water-quality-app/>).

**A2. Descriptive Statistics**

Comprehensive descriptive statistics for all measured water quality parameters measured across the three monitored sites (Eagle Creek, Fall Creek, and the Lower White River) are provided in Tables A2.1-A2.3. These tables include the full distributions (mean, standard deviation, minimum, and maximum) of nutrients, ions, heavy metals, and microbial indicators.

Table A2.1 Descriptive statistics of all parameters for Eagle Creek

| Parameter | Units | Mean | Standard Deviation | Minimum | Maximum |
| --- | --- | --- | --- | --- | --- |
| Temperature | °C | 20.0 | 11.6 | -0.3 | 82.9 |
| pH | Units | 7.94 | 0.58 | 6.59 | 12.6 |
| Specific Conductivity  (SpCond) | µS/cm | 2.61 | 1.09 | 0.50 | 5980 |
| Total Dissolved Solids (TDS) | mg/L | 404 | 236 | 0.70 | 7100 |
| Dissolved Oxygen (DO) | mg/L | 10.2 | 30.2 | 0.87 | 748 |
| *E. coli* | colonies/100mL | 140 | 995 | 1.00 | 24,200 |
| NH₃ | mg/L | 0.189 | 1.37 | 0.10 | 60.2 |
| NO₃ | mg/L | 2.86 | 2.88 | 0.50 | 42.0 |
| NO₂ | mg/L | 0.314 | 0.099 | 0.30 | 2.60 |
| Chloride | mg/L | 49.9 | 35.3 | 4.00 | 370 |
| SO₄ | mg/L | 31.2 | 14.4 | 6.00 | 108 |
| PO₄ | mg/L | 0.313 | 0.461 | 0.03 | 25.4 |
| Arsenic | µg/L | 0.0015 | 0.0043 | 0.000 | 0.218 |
| Barium | µg/L | 0.0647 | 0.0488 | 0.015 | 1.71 |
| Cadmium | µg/L | 0.0011 | 0.0025 | 0.000 | 0.086 |
| Chromium | µg/L | 0.0028 | 0.0061 | 0.001 | 0.131 |
| Copper | µg/L | 0.0030 | 0.0166 | 0.001 | 0.572 |
| Mercury | µg/L | 0.0000 | 0.0000 | 0.000 | 0.0004 |
| Nickel | µg/L | 0.0028 | 0.0061 | 0.001 | 0.097 |
| Lead | µg/L | 0.0015 | 0.0086 | 0.000 | 0.384 |

Table A2.2Descriptive statistics of all parameters for Fall Creek

| Parameter | Units | Mean | Standard Deviation | Minimum | Maximum |
| --- | --- | --- | --- | --- | --- |
| Temperature | °C | 19.1 | 13.0 | 0.10 | 80.2 |
| pH | Units | 7.88 | 0.49 | 0.36 | 12.2 |
| Specific Conductivity  (SpCond) | µS/cm | 0.602 | 0.258 | 0.140 | 6.06 |
| Total Dissolved Solids (TDS) | mg/L | 0.403 | 0.405 | 0.0036 | 8.08 |
| Dissolved Oxygen (DO) | mg/L | 8.53 | 4.22 | 1.86 | 69.6 |
| *E. coli* | colonies/100 mL | 1,490 | 4,490 | 1.00 | 24,200 |
| NH₃ | mg/L | 0.478 | 9.24 | 0.10 | 253 |
| NO₃ | mg/L | 1.04 | 0.737 | 0.10 | 5.13 |
| NO₂ | mg/L | 0.428 | 3.20 | 0.05 | 87.9 |
| Chloride | mg/L | 50.2 | 30.2 | 3.50 | 537 |
| SO₄ | mg/L | 32.6 | 13.0 | 6.00 | 101 |
| Arsenic | µg/L | 0.0022 | 0.0017 | 0.001 | 0.042 |
| Barium | µg/L | 0.0660 | 0.0254 | 0.015 | 0.620 |
| Cadmium | µg/L | 0.0010 | 0.0006 | 0.001 | 0.017 |
| Chromium | µg/L | 0.0101 | 0.0029 | 0.001 | 0.054 |
| Copper | µg/L | 0.0402 | 0.0098 | 0.0025 | 0.217 |
| Mercury | µg/L | 0.0004 | 0.0005 | 0.0004 | 0.012 |
| Nickel | µg/L | 0.0049 | 0.0021 | 0.0010 | 0.029 |
| Lead | µg/L | 0.0117 | 0.0016 | 0.0020 | 0.020 |
| Zinc | µg/L | 0.0472 | 0.0101 | 0.0039 | 0.110 |

Table A2.3 Descriptive statistics of all parameters for Lower White River

| Parameter | Units | Mean | Standard  Deviation | Minimum | Maximum |
| --- | --- | --- | --- | --- | --- |
| Temperature | °C | 17.8 | 13.6 | 0.001 | 81.0 |
| pH | Units | 7.84 | 0.260 | 5.88 | 8.82 |
| Specific Conductivity (SpCond) | µS/cm | 0.942 | 0.364 | 0.003 | 3.77 |
| Total Dissolved Solids (TDS) | mg/L | 0.611 | 0.254 | 0.002 | 3.89 |
| Dissolved Oxygen (DO) | mg/L | 9.31 | 2.97 | 1.98 | 25.2 |
| *E. coli* | colonies/100 mL | 2,470 | 6,270 | 10.0 | 98,300 |
| NH₃ | mg/L | 0.683 | 10.5 | 0.10 | 337 |
| NO₃ | mg/L | 1.07 | 10.3 | 0.20 | 358 |
| NO₂ | mg/L | 0.311 | 0.122 | 0.03 | 3.20 |
| Chloride | mg/L | 157 | 382 | 4.00 | 9,680 |
| SO₄ | mg/L | 51.6 | 25.7 | 2.30 | 157 |
| PO₄ | mg/L | 0.425 | 2.93 | 0.19 | 80.6 |
| Arsenic | µg/L | 2.15 | 2.15 | 1.00 | 51.8 |
| Barium | µg/L | 72.9 | 1.1 | 5.90 | 756 |
| Cadmium | µg/L | 1.00 | 0.0038 | 0.87 | 1.00 |
| Chromium | µg/L | 10.0 | 1.71 | 1.10 | 37.9 |
| Copper | µg/L | 40.5 | 7.11 | 20.1 | 171 |
| Mercury | µg/L | 0.478 | 2.70 | 0.20 | 93.9 |
| Nickel | µg/L | 4.34 | 1.56 | 1.00 | 13.2 |
| Lead | µg/L | 11.6 | 5.90 | 1.20 | 148 |
| Zinc | µg/L | 123 | 2,740 | 1.40 | 95,200 |

**A3. Principal Component Analysis (PCA) Loading Matrices**

PCA results for all three monitored sites (Eagle Creek, Fall Creek, and Lower White River) are presented in A3.1-A3.6. These tables include the full unrotated component loadings, varimax-rotated loadings, eigenvalues, and cumulative variance for each site. Eigenvalues and scree plots corresponding to each PCA are provided in Figures A3.1-3.3.

| | Table A3.1 Eagle Creek PCA | | | | | --- | --- | --- | --- | | Parameters | PC1 | PC2 | PC3 | | TDS | 0.076 | -0.096 | 0.068 | | *E. coli* | -0.013 | -0.035 | -0.121 | | Arsenic | 0.001 | 0.014 | -0.033 | | Cadmium | 0.009 | 0.025 | -0.043 | | Chromium | 0.027 | 0.117 | 0.963 | | Copper | -0.005 | 0.003 | -0.008 | | Chloride | 0.486 | -0.860 | 0.075 | | NO2 | 0.008 | 0.029 | -0.195 | | PO4 | 0.002 | 0.020 | -0.039 | | SO4 | 0.870 | 0.484 | -0.078 | | Total Variance (%) | 64.543 | 11.913 | 5.666 | | Cumulative Variance (%) | 64.543 | 76.457 | 82.123 | | | Table A3.2 Eagle Creek PCA after varimax rotation | | | | | --- | --- | --- | --- | | Parameters | VC1 | VC2 | VC3 | | TDS | -0.01 | 0.64 | 0.08 | | *E. coli* | 0.01 | 0.02 | -0.71 | | Arsenic | 0.93 | -0.02 | 0.03 | | Cadmium | 0.72 | 0.02 | 0.06 | | Chromium | -0.01 | 0.04 | 0.70 | | Copper | 0.00 | -0.07 | 0.03 | | Chloride | -0.01 | 0.87 | -0.01 | | NO2 | 0.34 | 0.05 | -0.20 | | PO4 | 0.94 | -0.01 | 0.02 | | SO4 | 0.04 | 0.83 | 0.12 | | Proportion % | 0.45 | 0.35 | 0.20 | | Cumulative % | 0.45 | 0.80 | 1.00 | |
| --- | --- | --- | --- | --- | --- | --- | --- | --- | --- | --- | --- | --- | --- | --- | --- | --- | --- | --- | --- | --- | --- | --- | --- | --- | --- | --- | --- | --- | --- | --- | --- | --- | --- | --- | --- | --- | --- | --- | --- | --- | --- | --- | --- | --- | --- | --- | --- | --- | --- | --- | --- | --- | --- | --- | --- | --- | --- | --- | --- | --- | --- | --- | --- | --- | --- | --- | --- | --- | --- | --- | --- | --- | --- | --- | --- | --- | --- | --- | --- | --- | --- | --- | --- | --- | --- | --- | --- | --- | --- | --- | --- | --- | --- | --- | --- | --- | --- | --- | --- | --- | --- | --- | --- | --- | --- | --- | --- | --- | --- | --- | --- | --- | --- |

| | Table A3.3 Fall Creek PCA | | | | | --- | --- | --- | --- | | Parameters | PC1 | PC2 | PC3 | | TDS | 0.007 | 0.056 | 0.026 | | *E. coli* | 0.999 | -0.050 | 0.004 | | Barium | 0.005 | 0.103 | -0.025 | | Chromium | -0.004 | 0.002 | 0.031 | | Copper | 0.001 | 0.023 | -0.127 | | Lead | 0.003 | -0.037 | 0.557 | | Zinc | -0.015 | -0.112 | 0.811 | | Chloride | 0.025 | 0.273 | 0.042 | | SO4 | 0.043 | 0.946 | 0.110 | | NH3 | -0.001 | 0.011 | 0.007 | | Total Variance (%) | 41.30 | 24.46 | 12.127 | | Cumulative Variance (%) | 41.30 | 65.76 | 77.889 | | | Table A3.4 Fall Creek PCA after varimax rotation | | | | | --- | --- | --- | --- | | Parameters | VC1 | VC2 | VC3 | | TDS | 0.41 | 0.10 | -0.10 | | *E. coli* | 0.11 | 0.06 | -0.72 | | Barium | 0.57 | -0.19 | 0.08 | | Chromium | 0.01 | 0.11 | 0.45 | | Copper | 0.03 | -0.67 | 0.02 | | Lead | 0.04 | 0.74 | -0.01 | | Zinc | -0.08 | 0.60 | 0.11 | | Chloride | 0.85 | 0.00 | 0.01 | | SO4 | 0.83 | -0.06 | 0.07 | | NH3 | 0.06 | 0.00 | 0.52 | | Proportion (%) | 0.44 | 0.33 | 0.23 | | Cumulative (%) | 0.44 | 0.77 | 1.00 | |
| --- | --- | --- | --- | --- | --- | --- | --- | --- | --- | --- | --- | --- | --- | --- | --- | --- | --- | --- | --- | --- | --- | --- | --- | --- | --- | --- | --- | --- | --- | --- | --- | --- | --- | --- | --- | --- | --- | --- | --- | --- | --- | --- | --- | --- | --- | --- | --- | --- | --- | --- | --- | --- | --- | --- | --- | --- | --- | --- | --- | --- | --- | --- | --- | --- | --- | --- | --- | --- | --- | --- | --- | --- | --- | --- | --- | --- | --- | --- | --- | --- | --- | --- | --- | --- | --- | --- | --- | --- | --- | --- | --- | --- | --- | --- | --- | --- | --- | --- | --- | --- | --- | --- | --- | --- | --- | --- | --- | --- | --- | --- | --- | --- | --- |

| | Table A3.5 Lower White River PCA | | | | --- | --- | --- | | Parameters | PC1 | PC2 | | PC3 | | TDS | -1.856 | 0.059 | | 0.603 | | *E. coli* | 8.392 | -0.028 | | -0.717 | | Arsenic | -2.084 | 0.052 | | 0.119 | | Barium | -7.305 | 0.047 | | 0.203 | | Chromium | 1.505 | 0.130 | | -0.012 | | Nickel | 2.105 | 0.967 | | -0.027 | | Chloride | -3.486 | -0.015 | | 0.151 | | NO2 | -1.472 | 0.003 | | -0.009 | | SO4 | -9.522 | 0.198 | | -0.210 | | NH3 | 8.462 | 0.006 | | 0.012 | | Total Variance (%) | 47.70 | 25.81 | | 7.126 | | Cumulative Variance (%) | 47.70 | 73.51 | | 80.634 | | | Table A3.6 Lower White River PCA after varimax rotation | | | | | | --- | --- | --- | --- | --- | | Parameters | VC1 | VC2 | VC3 | VC4 | | TDS | 0.71 | 0.02 | 0.42 | 0.05 | | *E. coli* | -0.52 | 0.00 | 0.08 | 0.08 | | Arsenic | 0.13 | 0.42 | 0.49 | -0.33 | | Barium | 0.65 | 0.11 | 0.03 | 0.40 | | Chromium | 0.02 | 0.77 | -0.03 | -0.02 | | Nickel | -0.09 | 0.77 | -0.08 | 0.11 | | Chloride | 0.17 | -0.15 | 0.68 | -0.08 | | NO2 | 0.34 | 0.03 | -0.54 | -0.46 | | SO4 | 0.71 | 0.11 | 0.11 | -0.04 | | NH3 | 0.08 | 0.04 | -0.09 | 0.75 | | Proportion % | 0.34 | 0.25 | 0.22 | 0.19 | | Cumulative % | 0.34 | 0.59 | 0.81 | 1.00 | |
| --- | --- | --- | --- | --- | --- | --- | --- | --- | --- | --- | --- | --- | --- | --- | --- | --- | --- | --- | --- | --- | --- | --- | --- | --- | --- | --- | --- | --- | --- | --- | --- | --- | --- | --- | --- | --- | --- | --- | --- | --- | --- | --- | --- | --- | --- | --- | --- | --- | --- | --- | --- | --- | --- | --- | --- | --- | --- | --- | --- | --- | --- | --- | --- | --- | --- | --- | --- | --- | --- | --- | --- | --- | --- | --- | --- | --- | --- | --- | --- | --- | --- | --- | --- | --- | --- | --- | --- | --- | --- | --- | --- | --- | --- | --- | --- | --- | --- | --- | --- | --- | --- | --- | --- | --- | --- | --- | --- | --- | --- | --- | --- | --- | --- | --- | --- | --- | --- | --- | --- | --- | --- | --- | --- | --- | --- | --- | --- | --- | --- | --- | --- | --- | --- | --- | --- | --- | --- | --- | --- |


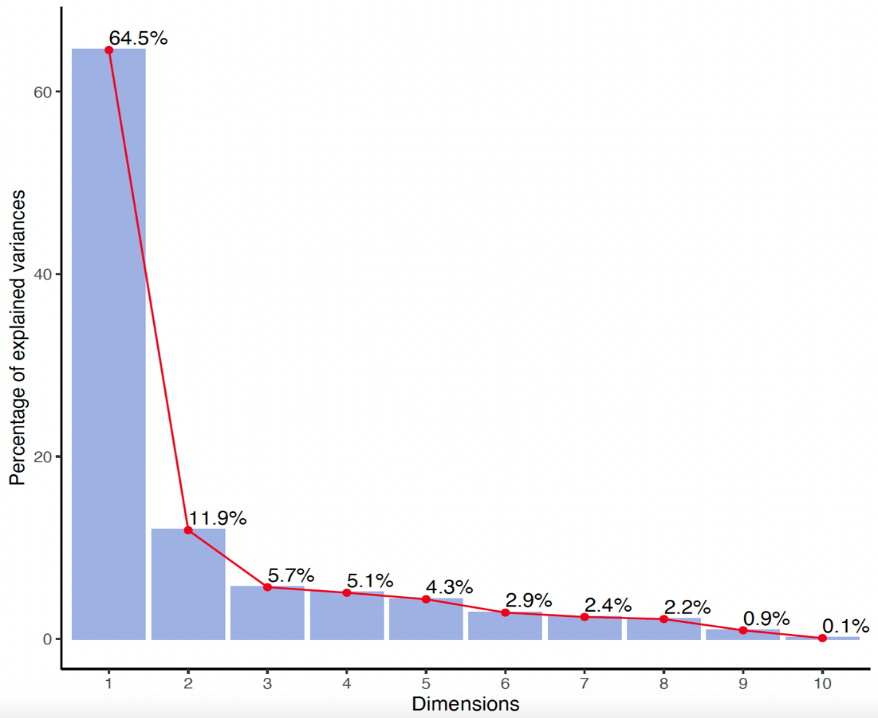


Fig A3.2 Eagle Creek scree plot of the principal components


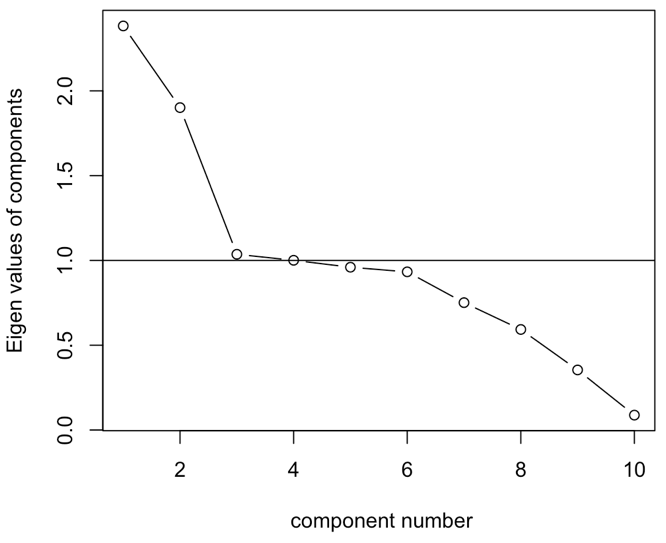


Fig A3.1 Eagle Creek eigenvalues from PCA


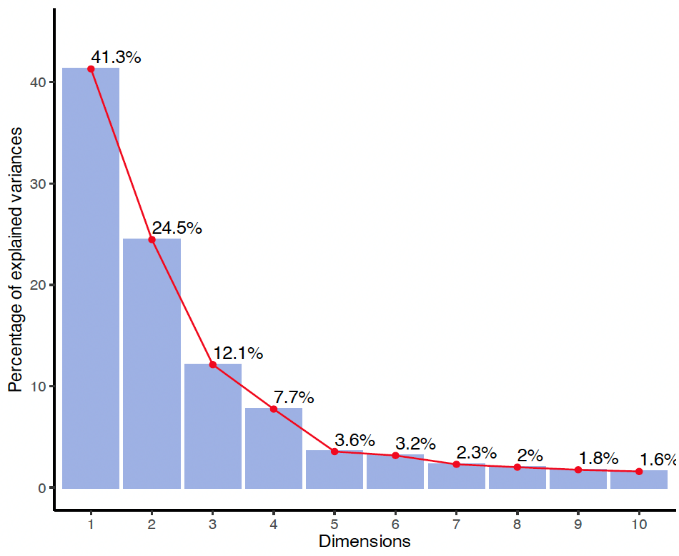


Fig A3.4 Fall Creek scree plot of the principal components


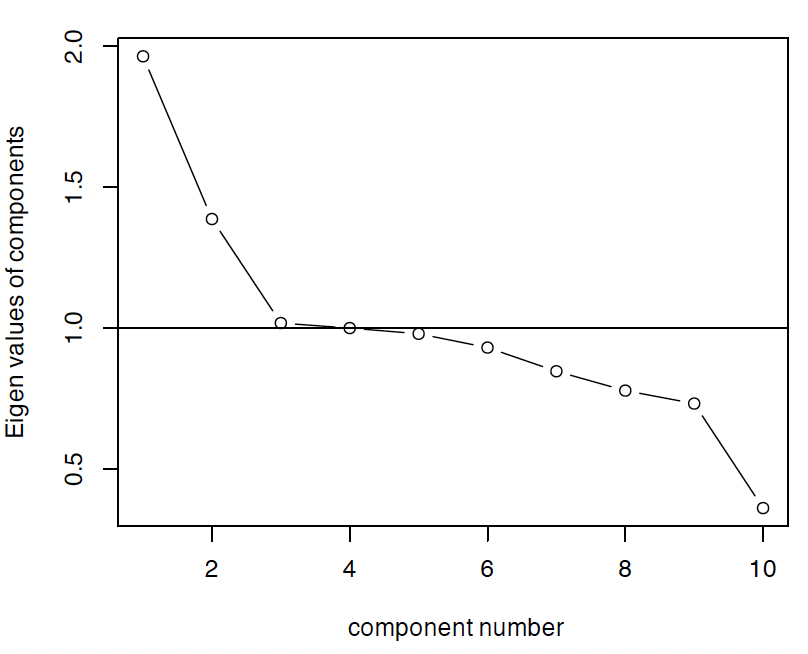


Fig A3.3 Fall Creek eigenvalues from PCA


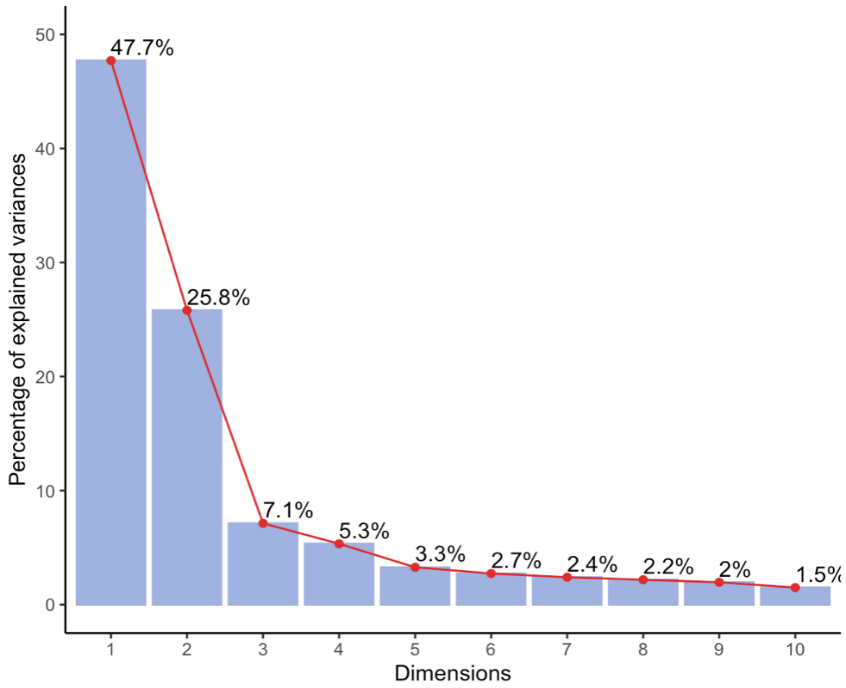


Fig A3.6 Lower White River scree plot of the principal components


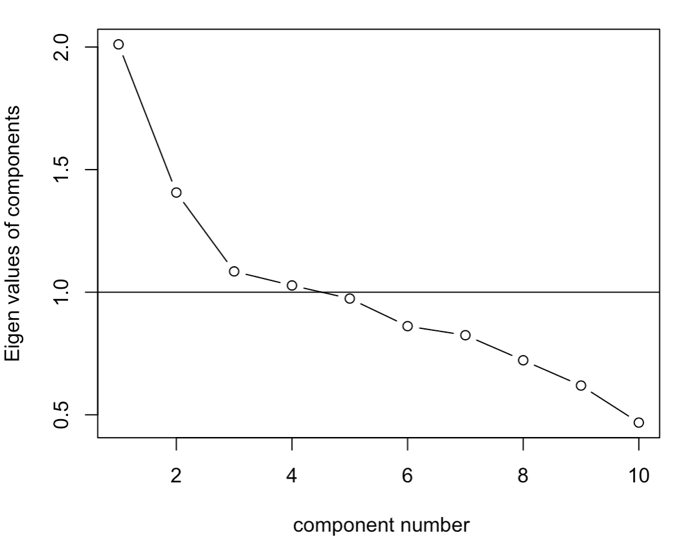


Fig A3.5 Lower White River eigenvalues from PCA
