# Supplementary material for: Decades of Urban Water Quality Data: A Multivariate Exploration Using Indianapolis as a Case Study
Source: Research Square preprint supplement (doi:10.21203/rs.3.rs-8348281/v1), 2026-02-13
Supplement: Supplementary file 2 [file f031ec5080e9c5e1185feb13.docx]

**Supplementary Materials B. Online Resource**

**Article Title:** Decades of Urban Water Quality Data: A Multivariate Exploration Using Indianapolis as a Case Study

**Journal:** Environmental Monitoring and Assessment

**Authors:** Raenah Bailey, Gabriel Filippelli, Jeffery Wilson

**Corresponding Author:**

Raenah Bailey
Department of Earth Sciences, Indiana University Indianapolis
Indianapolis, Indiana 46202, USA
Email: [raeabail@iu.edu](mailto:raeabail@iu.edu)

**Online Resource:** Interactive Web Application

- **Title**: Decades of Urban Water Quality Data: A Multivariate Exploration Using Indianapolis as a Case Study
- **Description**: This online resource provides an interactive dashboard summarizing 24 years (1995–2020) of surface water monitoring data collected by the Marion County Public Health Department (MCPHD) for Eagle Creek, Fall Creek, and the Lower White River (Marion County, Indiana, USA). Users can view parameter-level summaries, full PCA loadings, clustering/LDA context, and site-by-site visualizations for Eagle Creek, Fall Creek, and the Lower White River.
- **Parameter summaries:** Physicochemical measures (temperature, pH, dissolved oxygen, specific conductance, TDS), nutrients (NH₃, NO₂⁻, NO₃⁻, PO₄³⁻), chloride and sulfate, E. coli, and metals (As, Ba, Cd, Cr, Cu, Hg, Ni, Pb, Zn).
- **Multivariate analysis outputs:** Principal component analysis (PCA) with varimax rotation; clustering results (K-means, silhouette validation); and linear discriminant analysis (LDA) classification.
- **Site-level visualization:** PCA plots, k-means clustering plots, and loadings tables by site.
- **Analytical methods:** Records were quality-checked, units harmonized, and variables standardized prior to analysis. PCA components were retained using eigenvalues > 1 and scree test, followed by varimax rotation. Cluster solutions were determined by average silhouette width, and cluster separability was evaluated with LDA.
- **Software**: R (R Foundation for Statistical Computing) was used for all analyses (stats, psych, cluster, MASS packages).
- **Versioning:** Dashboard release v1.0 (updated September 25, 2025). Future updates will be noted in the dashboard footer.
- **Data availability:** Primary monitoring records are maintained by MCPHD and publicly available at: <https://marionhealth.org/surface-water-program/>. Derived data and code used to generate this dashboard are available from the corresponding author upon reasonable request.
- **Access:** The web application is hosted at: <https://raeabail.github.io/indy-urban-water-quality-app/>
- **Accessibility Information**: Compatible with current desktop and mobile browsers; supports screen readers; no flashing content (>3 Hz).
- **System requirements:** Modern web browser (Chrome, Firefox, Edge, or Safari).

**Captions for Supplementary Material**

1. **Online Resource:** Interactive web application visualizing long-term trends, PCA loadings, clustering context, and site-specific statistics for Indianapolis surface waters (Marion County, IN). Accessible at https://raeabail.github.io/indy-urban-water-quality-app/

**Additional Notes**

- The application includes guidance for navigating filters, parameters, and site views.
- No additional downloadable files are associated with this supplementary material.

This supplementary material is provided to enhance the reader’s understanding of the study’s outcomes by offering a hands-on, visual representation of the data and models used in the research.
